# Supplementary material for: PRMT5 Inhibition Promotes PD-L1 Expression and Immuno-Resistance in Lung Cancer
Source: Front Immunol. 2022 Jan 17;12:722188. doi: 10.3389/fimmu.2021.722188 (PMC8801487; doi:10.3389/fimmu.2021.722188)
Supplement: Supplementary file 1 [file DataSheet_1.pdf]

## **PRMT5 inhibition promotes PD-L1 expression and immuno-resistance in lung cancer**

Rui Hu<sup>1†</sup>, Bingqian Zhou<sup>2†</sup>, Zheyi Chen<sup>2</sup>, Shiyu Chen<sup>2</sup>, Ningdai Chen<sup>2</sup>, Lisong Shen<sup>2, 3, 4\*</sup>, Haibo Xiao<sup>1\*</sup>, Yingxia Zheng<sup>2\*</sup>

<sup>1</sup> Department of Thoracic Surgery, Xin Hua Hospital, Shanghai Jiao Tong University School of Medicine, Shanghai, China; <sup>2</sup> Department of Laboratory Medicine, Xin Hua Hospital, Shanghai Jiao Tong University School of Medicine, Shanghai, China; <sup>3</sup> Faculty of Medical Laboratory Science, Shanghai Jiao Tong University School of Medicine, Shanghai, China. <sup>4</sup> Xin Hua Children's Hospital, Shanghai Jiao Tong University School of Medicine.

<sup>†</sup> These authors contributed equally to this paper.

\* Correspondence e-mails: [lisongshen@hotmail.com](mailto:lisongshen@hotmail.com) (L.S.); [xiaohaibo@xinhumed.com.cn](mailto:xiaohaibo@xinhumed.com.cn) (H.X.); [zhengyingxia@xinhumed.com.cn](mailto:zhengyingxia@xinhumed.com.cn) (Y.Z.).

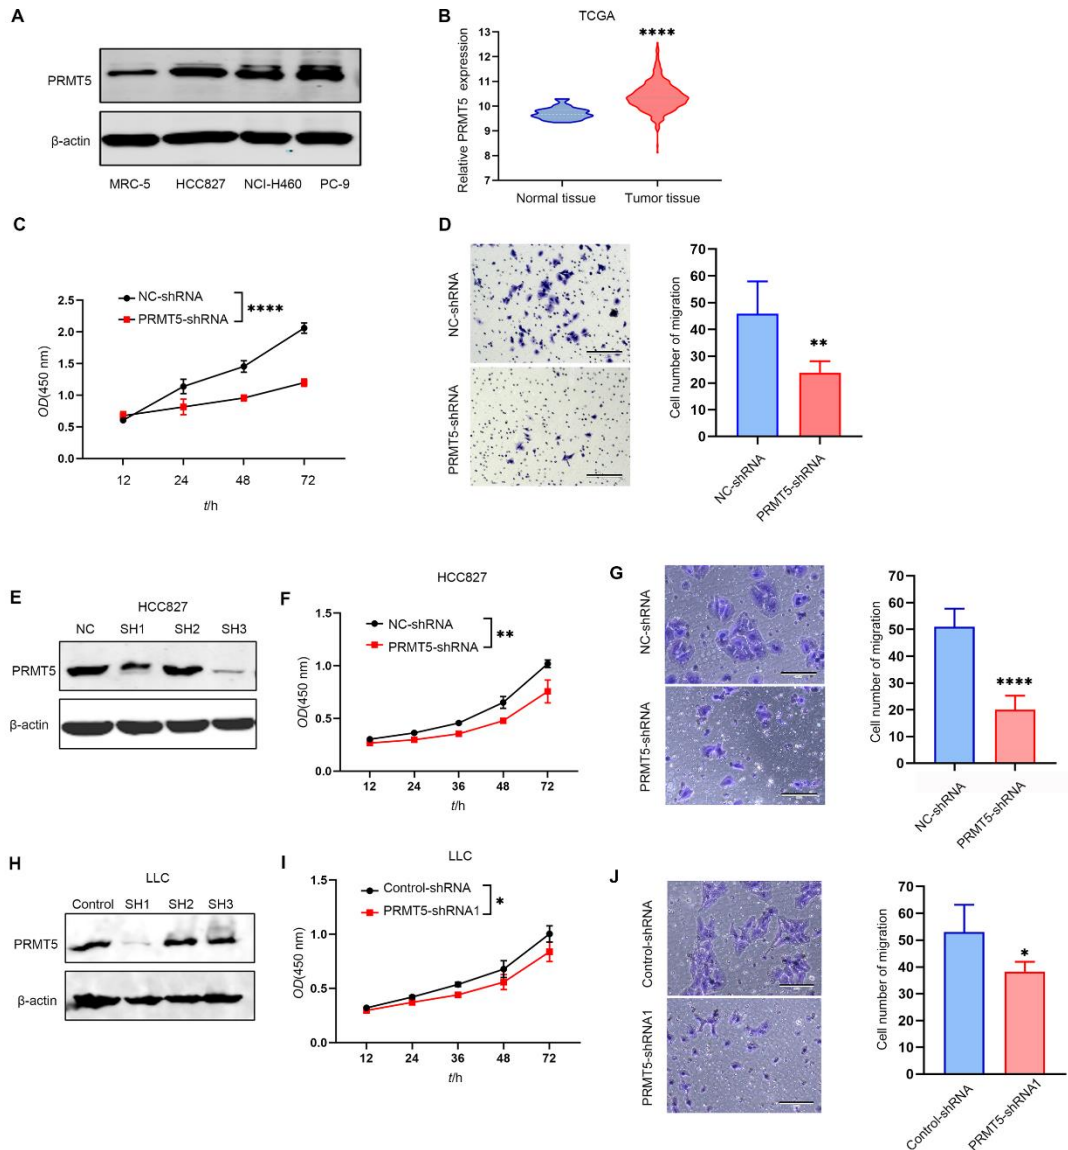

### Supplementary Figure.1 PRMT5 expression in Lung cancer cell and its effects on proliferation and migration of lung cancer cell lines.

(A) PRMT5 expression in human embryonic lung fibroblasts and lung cancer cells lines was detected by western blot,  $\beta$ -actin as the loading control. (B) Analysis of TCGA RNA-seq data of human lung adenocarcinoma, violin plots showed the relative *PRMT5* expression between normal tissues and tumor tissues. Statistical differences were determined by two-tailed unpaired Student's t test, \*\*\*\* $P < 0.0001$ . (E,H) Three sites of shRNA sequence targeting human PRMT5 or murine PRMT5 were designed, separately. *PRMT5* specific or control shRNA were transfected into human lung cancer line HCC827(E) and murine lung cancer cell line LLC(H).PRMT5 expression was measured by western blotting,  $\beta$ -actin as the loading control. (C, F and I) Effects of *PRMT5*-shRNA on the proliferation of NCI-H460(C), HCC827 (F) and LLC (I) cells were detected by CCK8 assay. Statistical differences were determined by two-tailed unpaired Student's t test, \*\*\*\* $P < 0.0001$ . (D, G, J) Effects of *PRMT5*-shPRMT5 on the migration ability of NCI-H460 (D), HCC827 (G) and LLC

(J) cells. Scale bar 200 $\mu$ m. Data were the means  $\pm$  SEM of three independent experiments. Statistical differences were determined by two-tailed unpaired Student's t test,  $**P < 0.01$ .

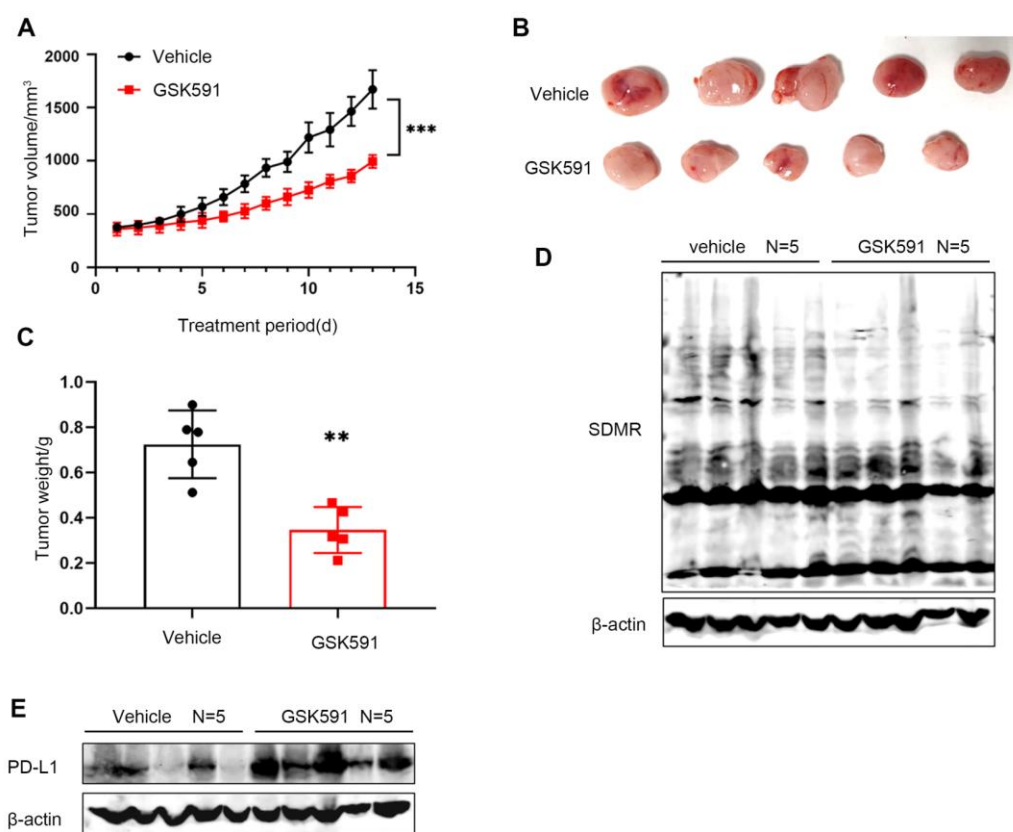

### Supplementary Figure 2 Inhibition of PRMT5 suppresses lung cancer cell growth in nude mice.

(A, B and C) Nude mice bearing LLC tumors were treated with GSK591 (50mg/kg) or vehicle (n=5/group) for 12 days. Tumor growth curves (A), images of resected tumor (B), and tumor weights (C) were shown. Statistical differences were determined by two-tailed unpaired Student's t test,  $**P < 0.01$ ,  $***P < 0.001$ . (D and E) SDMR (D) and PD-L1 (E) expression was analysis of tumor sections (N=5 each group) from vehicle and GSK591 treated group by western blot;  $\beta$ -actin served as loading control.

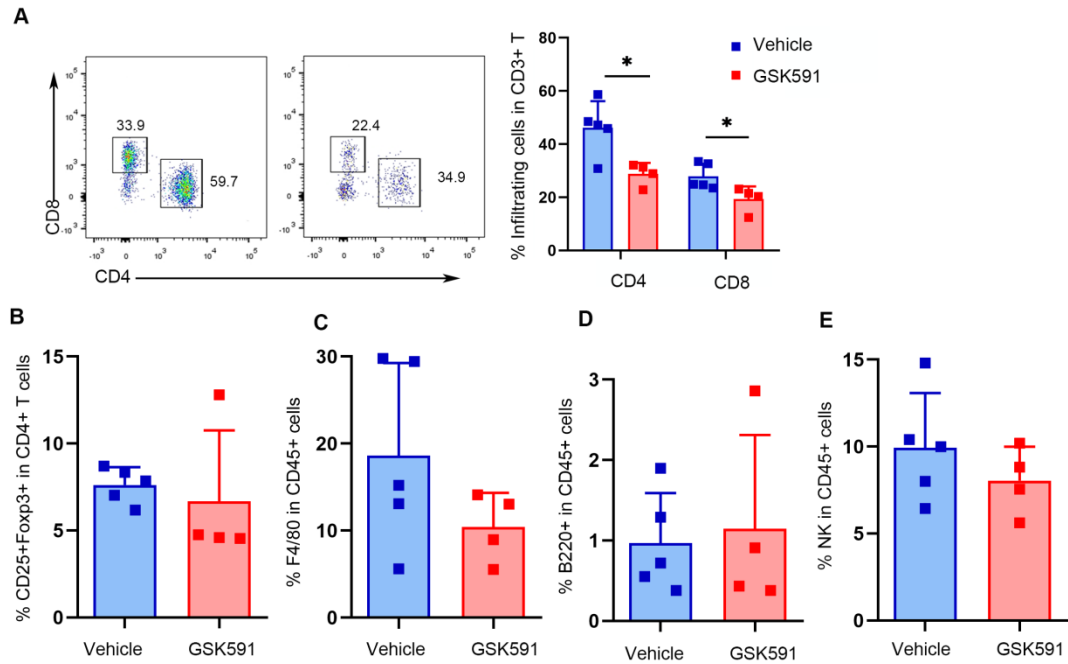

**Supplementary Figure 3 RMT5 inhibition reduced T cell infiltration into lung tissue.**

C57BL/6 mice bearing LLC tumor were treated with GSK591 (50mg/kg, n=4) or vehicle (n=5) for 12 days. Mice were sacrificed on day 20 after implantation. (A) Flow cytometry analysis of tumor infiltrating CD8<sup>+</sup> T and CD4<sup>+</sup> T cells. The representative plots were shown (Left). Bar graph was the means  $\pm$  SEM (Right). Statistical differences were determined by two-tailed unpaired Student's t test,  $*P < 0.05$ . (B-E) Flow cytometry analysis of tumor infiltrating Treg cells (B), macrophages (C), B cells (D) and NK cell (E).

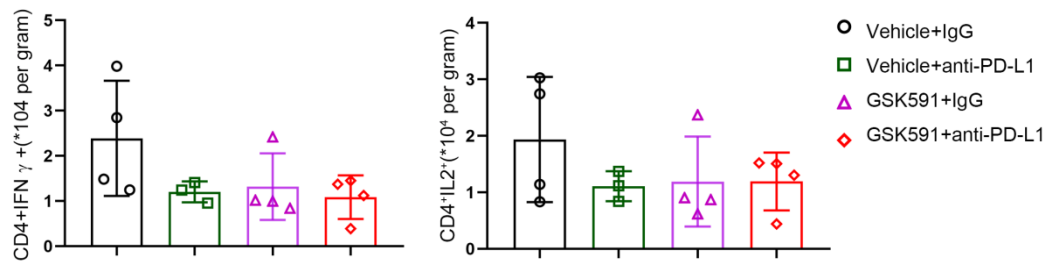

**Supplementary Figure 4 Combined PRMT5 inhibition and anti-PD-L1 antibody treatment had no impact on CD4 T cells cytokines expression.**

C57BL/6 mice bearing LLC tumors following treatment with IgG (10mg/kg), anti-PD-L1 (10mg/kg), GSK591 (50mg/kg) and the combination (n=4 per group) (day 18 post tumor cell implantation). Quantification of CD4 T cells expressing effector markers (IFN $\gamma$  and IL-2) as per gram of tumor.

**Supplementary Table 1. List of antibodies used for flow cytometry**

| antibody                              | Company    | Cat#       |
|---------------------------------------|------------|------------|
| PE Anti-mouse PDL1                    | Biolegend  | 124307     |
| BV421 Anti-human PDL1                 | BD         | 563738     |
| APC-cy7 Anti-human CD8                | Biolegend  | 344714     |
| Percpcy5.5 Anti-mouse CD8             | BD         |            |
| FITC Anti-Mouse CD4                   | BD         | 557307     |
| Annexin V PE Apop Dtec Kit            | BD         | 559763     |
| BV421 Anti-human IFN $\gamma$         | BD         | 562988     |
| APC Anti-human TNF- $\alpha$          | Invitrogen | 17-7349-82 |
| PE Anti-human Granzyme B              | Biolegend  | 372208     |
| BV421 Anti-mouse TNF $\alpha$         | Invitrogen | 48-7321-82 |
| APC Anti-mouse IFN $\gamma$           | Invitrogen | 17-7311-81 |
| PE-Cy <sup>TM</sup> 7 Anti-Mouse CD45 | BD         | 552848     |
| APC-cy7 Anti-mouse CD3                | BD         | 557596     |
| PerCP/Cyanine5.5 Anti-human CD4       | Biolegend  | 317428     |
| BV421 Anti-mouse CD8a                 | Biolegend  | 100737     |
| PE Anti-mouse IL-2                    | Invitrogen | 12-7021-82 |

**Supplementary Table 2. Primers sequences**

| Genes                     | Species | Sequence(5'-3')         |
|---------------------------|---------|-------------------------|
| <i>Prmt5</i> -F           | Mouse   | CTGAATTGCGTCCCCGAAATA   |
| <i>Prmt5</i> -R           | Mouse   | AGGTTCTGAATGAACTCCCT    |
| <i>Actb</i> -F: ,         | Mouse   | TGTCCACCTTCCAGCAGATGT   |
| <i>Actb</i> -R:           | Mouse   | AGCTCAGTAACAGTCCGCCTAG  |
| <i>CD274</i> -F           | Human   | ACAGCTGAATTGGTCATCCC    |
| <i>CD274</i> -R           | Human   | TGTCAGTGCTACACCAAGGC    |
| <i>GAPDH</i> -F           | Human   | GGAGCGAGATCCCTCCAAAAT   |
| <i>GAPDH</i> -R           | Human   | GGCTGTTGTCATACTTCTCATGG |
| <i>STAT1</i> -F           | Human   | CGGCTGAATTTCCGGCACCT    |
| <i>STAT1</i> -R           | Human   | CAGTAACGATGAGAGGACCCT   |
| <i>Cd274</i> -F           | Mouse   | AAGCCTCAGCACAGCAACTTCAG |
| <i>Cd274</i> -R           | Mouse   | TGTAGTCCGCACCACCGTAGC   |
| <i>CD274</i> -Promoter-F  | Human   | AACCAATGCAAGGGCTATCTC   |
| <i>CD274</i> -Promoter-R  | Human   | GTGCCTGTGTGCTCCCTTTTC   |
| <i>GAPDH</i> -Promoter-F  | Human   | CTGAGCAGACCGGTGTCACATC  |
| <i>GAPDH</i> - Promoter-R | Human   | GAGGACTTTGGGAACGACTGAG  |
| <i>Gapdh</i> -Promoter-F  | Mouse   | CTCAGGGCGCGAAAGTAAAG    |
| <i>Gapdh</i> -Promoter-R  | Mouse   | CGGCCCGGAGTCTTAAGTAT    |
| <i>Cd274</i> -Promoter-F  | Mouse   | CACCCCTGCTTTCACTGTTG    |
| <i>Cd274</i> -Promoter-R  | Mouse   | GTGAAGTTTCCGCAGACCAC    |
